# Supplementary material
Source: publisher figshare collection journal article supplement (https://tandf.figshare.com/articles/dataset/_/24160323)
Supplement: Supplementary file 1 [file 1]

**VC1**

| Res1 Chain | Res1 Seq # | Res1 AA | Res2 Chain | Res2 Seq # | Res2 AA | Chi3 | Energy | Sum B-Factors |
| --- | --- | --- | --- | --- | --- | --- | --- | --- |
| A | 238 | CYS | A | 257 | CYS | 91.01 | 0.13 | 17.56 |
| A | 18 | CYS | A | 33 | CYS | 99.83 | 1.01 | 12.53 |
| A | 300 | GLY | A | 331 | VAL | 85.12 | 1.59 | 24.93 |
| A | 271 | ALA | A | 279 | SER | 110.21 | 1.78 | 20.98 |
| A | 54 | VAL | A | 88 | ALA | -77.04 | 2.34 | 11.46 |
| A | 194 | GLY | A | 295 | GLY | 95.05 | 2.45 | 25.15 |
| A | 151 | ALA | A | 172 | GLY | 111.07 | 2.57 | 25.53 |
| A | 194 | GLY | A | 225 | CYS | 103.69 | 2.98 | 23.6 |
| A | 197 | ALA | A | 225 | CYS | 108.21 | 3.05 | 23.53 |
| A | 228 | ALA | A | 231 | ALA | -97.1 | 3.07 | 24.06 |
| A | 130 | LYS | A | 199 | VAL | -88.69 | 3.62 | 22.1 |
| A | 306 | GLY | A | 314 | SER | 103.08 | 3.66 | 28.92 |
| A | 249 | TYR | A | 261 | CYS | 93.33 | 3.74 | 18.41 |
| A | 129 | SER | A | 149 | VAL | -75.95 | 3.8 | 21.88 |
| A | 302 | ARG | A | 318 | ALA | 87.82 | 3.81 | 26.59 |
| A | 7 | GLN | A | 31 | GLY | 109.47 | 3.96 | 19.85 |
| A | 55 | ALA | A | 88 | ALA | -98.3 | 4.1 | 11.31 |
| A | 194 | GLY | A | 197 | ALA | 109.37 | 4.33 | 25.87 |
| A | 12 | ARG | A | 13 | VAL | -73.25 | 4.55 | 17.89 |
| A | 158 | MET | A | 170 | SER | -92.73 | 4.98 | 25.79 |
| A | 277 | GLY | A | 327 | LYS | -100.33 | 5.1 | 23.51 |
| A | 343 | SER | A | 348 | ALA | -84.83 | 5.19 | 26.24 |
| A | 340 | TYR | A | 354 | PRO | 106.64 | 5.37 | 26.25 |
| A | 271 | ALA | A | 283 | GLY | 109.24 | 5.52 | 20.1 |
| A | 177 | LEU | A | 212 | GLY | 107.37 | 5.66 | 25.91 |
| A | 336 | ASN | A | 354 | PRO | 108.72 | 5.7 | 26.44 |
| A | 33 | CYS | A | 38 | ARG | 111.5 | 6.35 | 10.32 |
| A | 348 | ALA | A | 366 | PRO | 102.46 | 6.5 | 28.89 |
| A | 298 | GLU | A | 301 | ARG | 106.62 | 6.84 | 24.45 |

VC2

| Res1 Chain | Res1 Seq # | Res1 AA | Res2 Chain | Res2 Seq # | Res2 AA | Chi3 | Energy | Sum B-Factors |
| --- | --- | --- | --- | --- | --- | --- | --- | --- |
| A | 425 | TYR | A | 444 | VAL | 89.29 | 2.02 | 32.34 |
| A | 63 | PHE | A | 113 | ALA | 85.95 | 2.04 | 3.18 |
| A | 57 | ALA | A | 133 | ALA | 99.45 | 2.08 | 7.25 |
| A | 351 | SER | A | 364 | SER | 89.06 | 2.11 | 17.16 |
| A | 300 | PRO | A | 362 | GLY | 92.82 | 2.16 | 17.41 |
| A | 325 | ARG | A | 336 | ALA | 83.2 | 2.2 | 12.33 |
| A | 264 | MET | A | 275 | LEU | 89.59 | 2.46 | 20.06 |
| A | 261 | GLY | A | 276 | GLY | -105.19 | 2.51 | 20.46 |
| A | 254 | ILE | A | 272 | GLY | -112.59 | 2.66 | 21.9 |
| A | 50 | ALA | A | 140 | ALA | 115.11 | 2.71 | 10.87 |
| A | 222 | PHE | A | 236 | ALA | 84.41 | 2.96 | 26.21 |
| A | 199 | GLY | A | 202 | SER | 103.37 | 3.18 | 16.18 |
| A | 177 | ALA | A | 182 | MET | 76.42 | 3.32 | 18.19 |
| A | 283 | PRO | A | 316 | ALA | 77.08 | 3.32 | 11.55 |
| A | 62 | GLU | A | 132 | ALA | -104.08 | 3.46 | 4.72 |
| A | 330 | GLU | A | 348 | SER | -97.33 | 3.49 | 12.82 |
| A | 69 | ALA | A | 126 | THR | 114.64 | 3.72 | 1.94 |
| A | 394 | LYS | A | 397 | SER | 115.95 | 3.77 | 30.27 |
| A | 218 | PRO | A | 226 | VAL | -107.76 | 3.86 | 24.59 |
| A | 240 | PRO | A | 243 | MET | 129.74 | 3.91 | 27.83 |
| A | 323 | CYS | A | 342 | CYS | 120.99 | 4.02 | 9.91 |
| A | 38 | ALA | A | 159 | SER | 101.22 | 4.07 | 18.38 |
| A | 402 | THR | A | 442 | GLY | 73.07 | 4.08 | 31.95 |
| A | 236 | ALA | A | 255 | SER | 131.39 | 4.15 | 25.94 |
| A | 73 | LYS | A | 124 | GLY | -55.5 | 4.18 | 1.82 |
| A | 327 | CYS | A | 346 | CYS | 118.7 | 4.3 | 9.97 |
| A | 404 | SER | A | 456 | VAL | 120.76 | 4.35 | 30.65 |
| A | 428 | SER | A | 433 | ALA | 101.01 | 4.42 | 31.75 |
| A | 385 | GLY | A | 416 | VAL | -118.98 | 4.44 | 25.96 |
| A | 354 | SER | A | 407 | GLY | 133.69 | 4.52 | 24.4 |
| A | 280 | PRO | A | 321 | GLY | 124.52 | 4.78 | 13.38 |
| A | 382 | HIS | A | 415 | ASN | 134.49 | 4.81 | 24.3 |
| A | 88 | LEU | A | 92 | GLU | 124.11 | 4.84 | 2.74 |
| A | 348 | SER | A | 351 | SER | -103.95 | 4.85 | 14.23 |
| A | 16 | MET | A | 20 | GLU | 136.33 | 4.99 | 16.92 |
| A | 65 | VAL | A | 104 | LEU | -119.84 | 5.18 | 3.04 |
| A | 50 | ALA | A | 144 | LEU | -91.2 | 5.22 | 11.34 |
| A | 120 | LEU | A | 125 | ALA | 115.65 | 5.3 | 1.65 |
| A | 105 | LEU | A | 108 | VAL | 130.16 | 5.48 | 4.03 |
| A | 336 | ALA | A | 344 | ARG | -76.78 | 5.51 | 13.4 |
| A | 21 | LEU | A | 48 | ALA | 103.13 | 5.72 | 15.11 |
| A | 349 | GLU | A | 401 | ASN | -110.53 | 5.81 | 22.38 |
| A | 314 | LEU | A | 377 | THR | -106.86 | 5.95 | 12.25 |
| A | 404 | SER | A | 443 | ASN | 115.86 | 5.98 | 32.04 |
| A | 108 | VAL | A | 112 | ALA | 88.55 | 6.09 | 3.66 |
| A | 433 | ALA | A | 435 | GLY | 91.53 | 6.09 | 32.2 |
| A | 80 | VAL | A | 123 | ALA | -125.91 | 6.19 | 1.61 |
| A | 221 | GLY | A | 299 | GLY | 135.32 | 6.56 | 19.74 |
| A | 346 | CYS | A | 387 | ARG | 129.51 | 6.58 | 17.47 |
| A | 377 | THR | A | 379 | CYS | 136.36 | 7.01 | 15.93 |
| A | 155 | VAL | A | 157 | GLY | 119.91 | 7.11 | 16.11 |
| A | 165 | SER | A | 169 | GLY | -47.97 | 7.39 | 14.98 |
| A | 13 | PHE | A | 47 | ALA | 106.9 | 7.52 | 12.4 |
| A | 297 | GLY | A | 302 | SER | -120.96 | 7.57 | 13.63 |
| A | 81 | VAL | A | 93 | ALA | -118.76 | 7.92 | 1.8 |
| A | 326 | ILE | A | 345 | ILE | 136.86 | 7.95 | 9.36 |
| A | 339 | GLY | A | 342 | CYS | -56.75 | 7.99 | 12.7 |
| A | 142 | TRP | A | 304 | PHE | 123.91 | 8.68 | 10.61 |
